# Supplementary figures and images for: Astroclimes – measuring the abundance of CO2 and CH4 in the Earth's atmosphere using astronomical observations
Source: Copernicus journal article supplement (doi:10.5194/egusphere-2024-2433), 2024-10-02

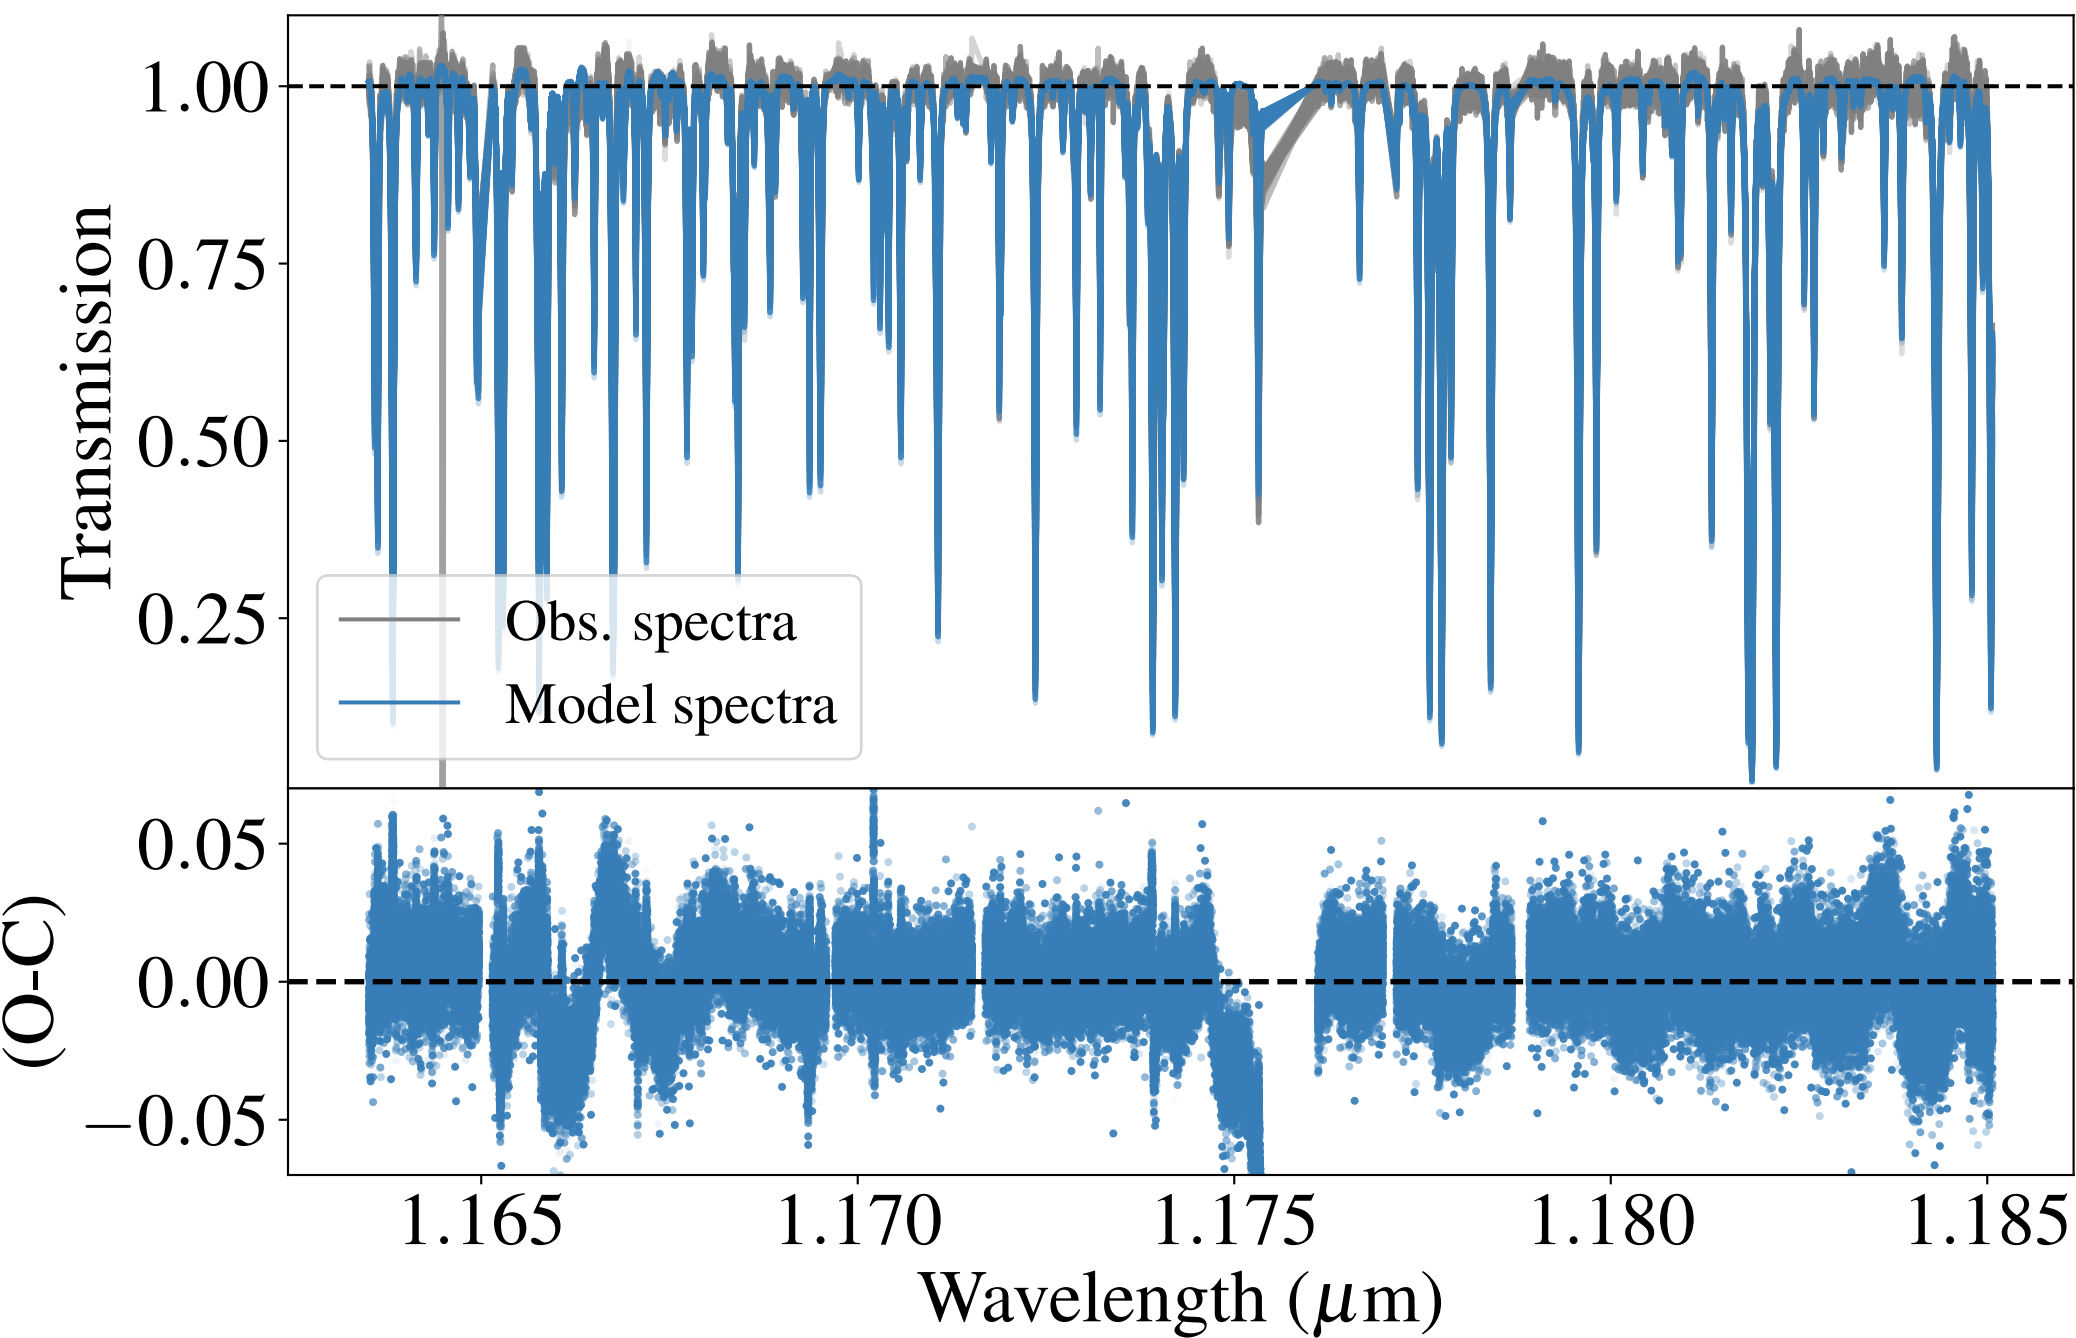

Supplement: Supplementary file 1 [file egusphere-2024-2433-supplement.zip]

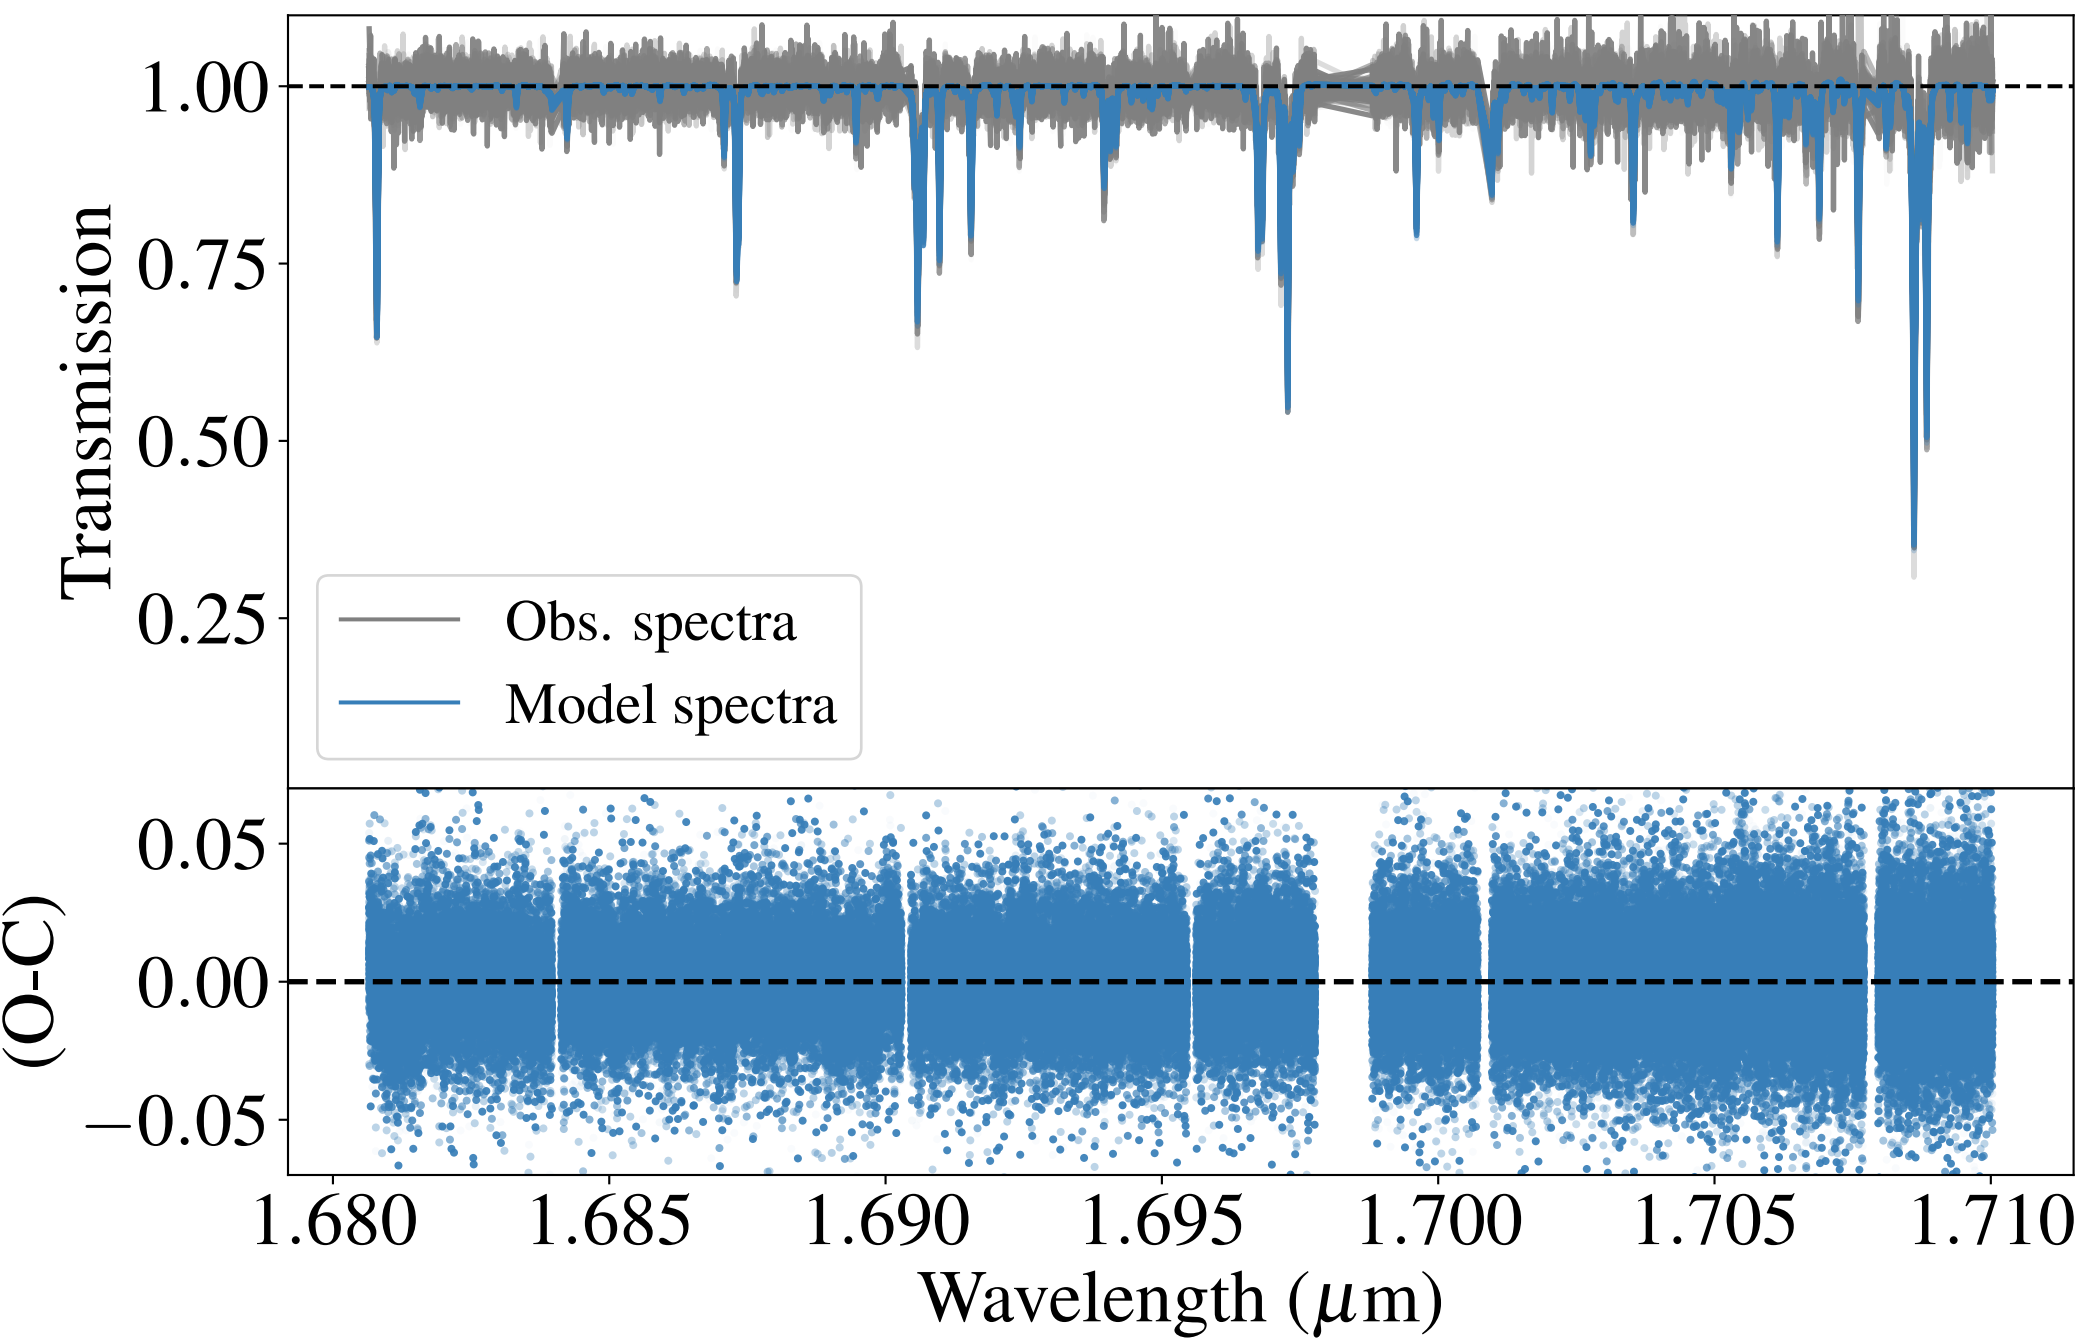

Supplement: Supplementary file 2 [file egusphere-2024-2433-supplement.zip]

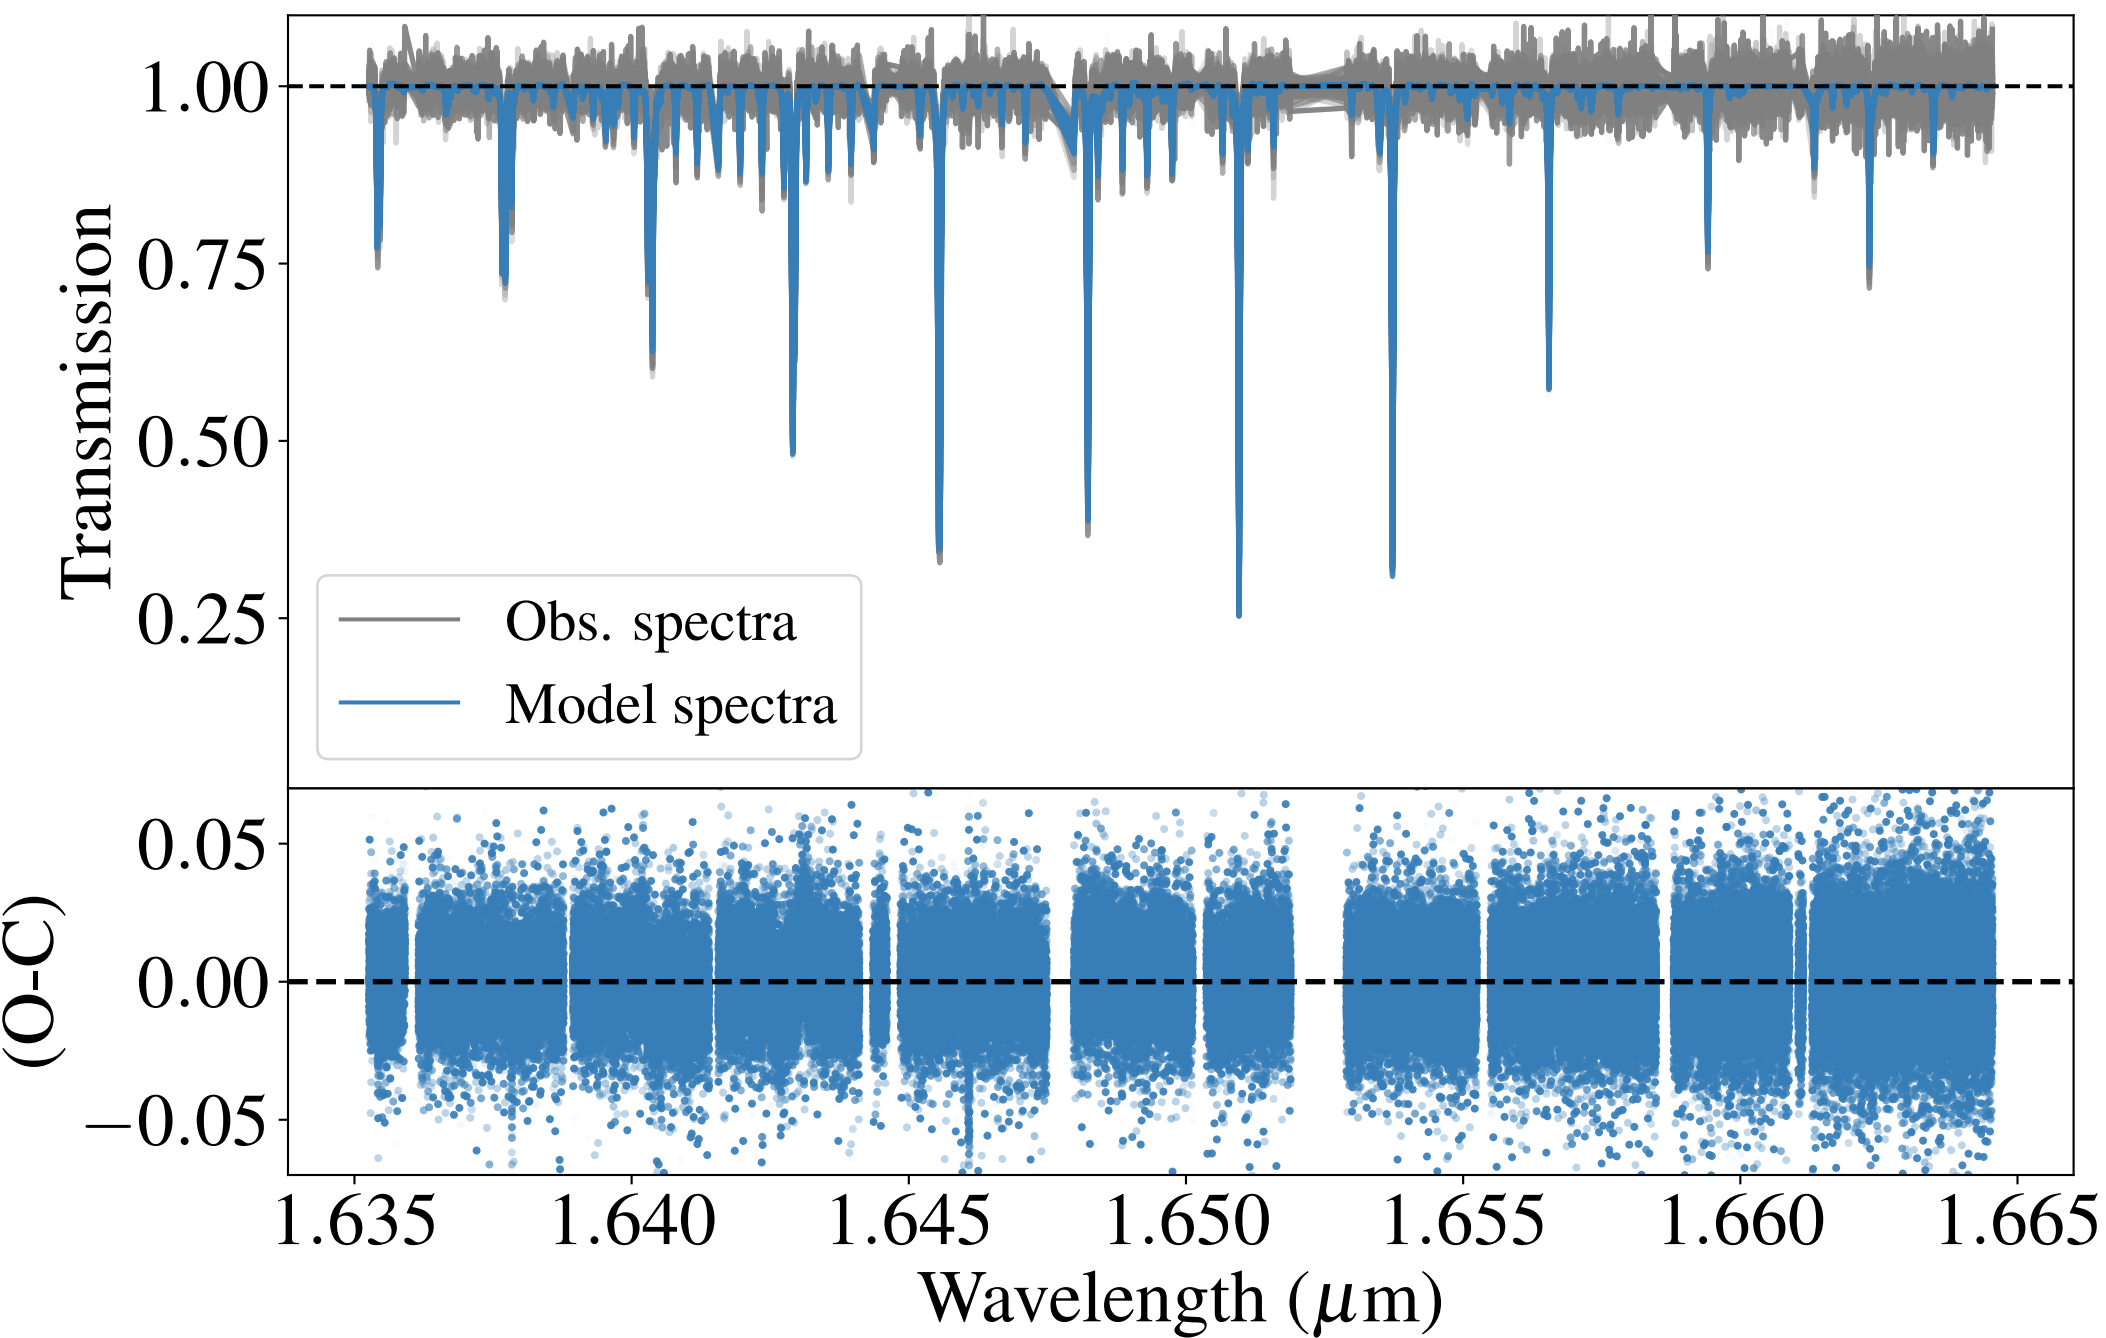

Supplement: Supplementary file 3 [file egusphere-2024-2433-supplement.zip]

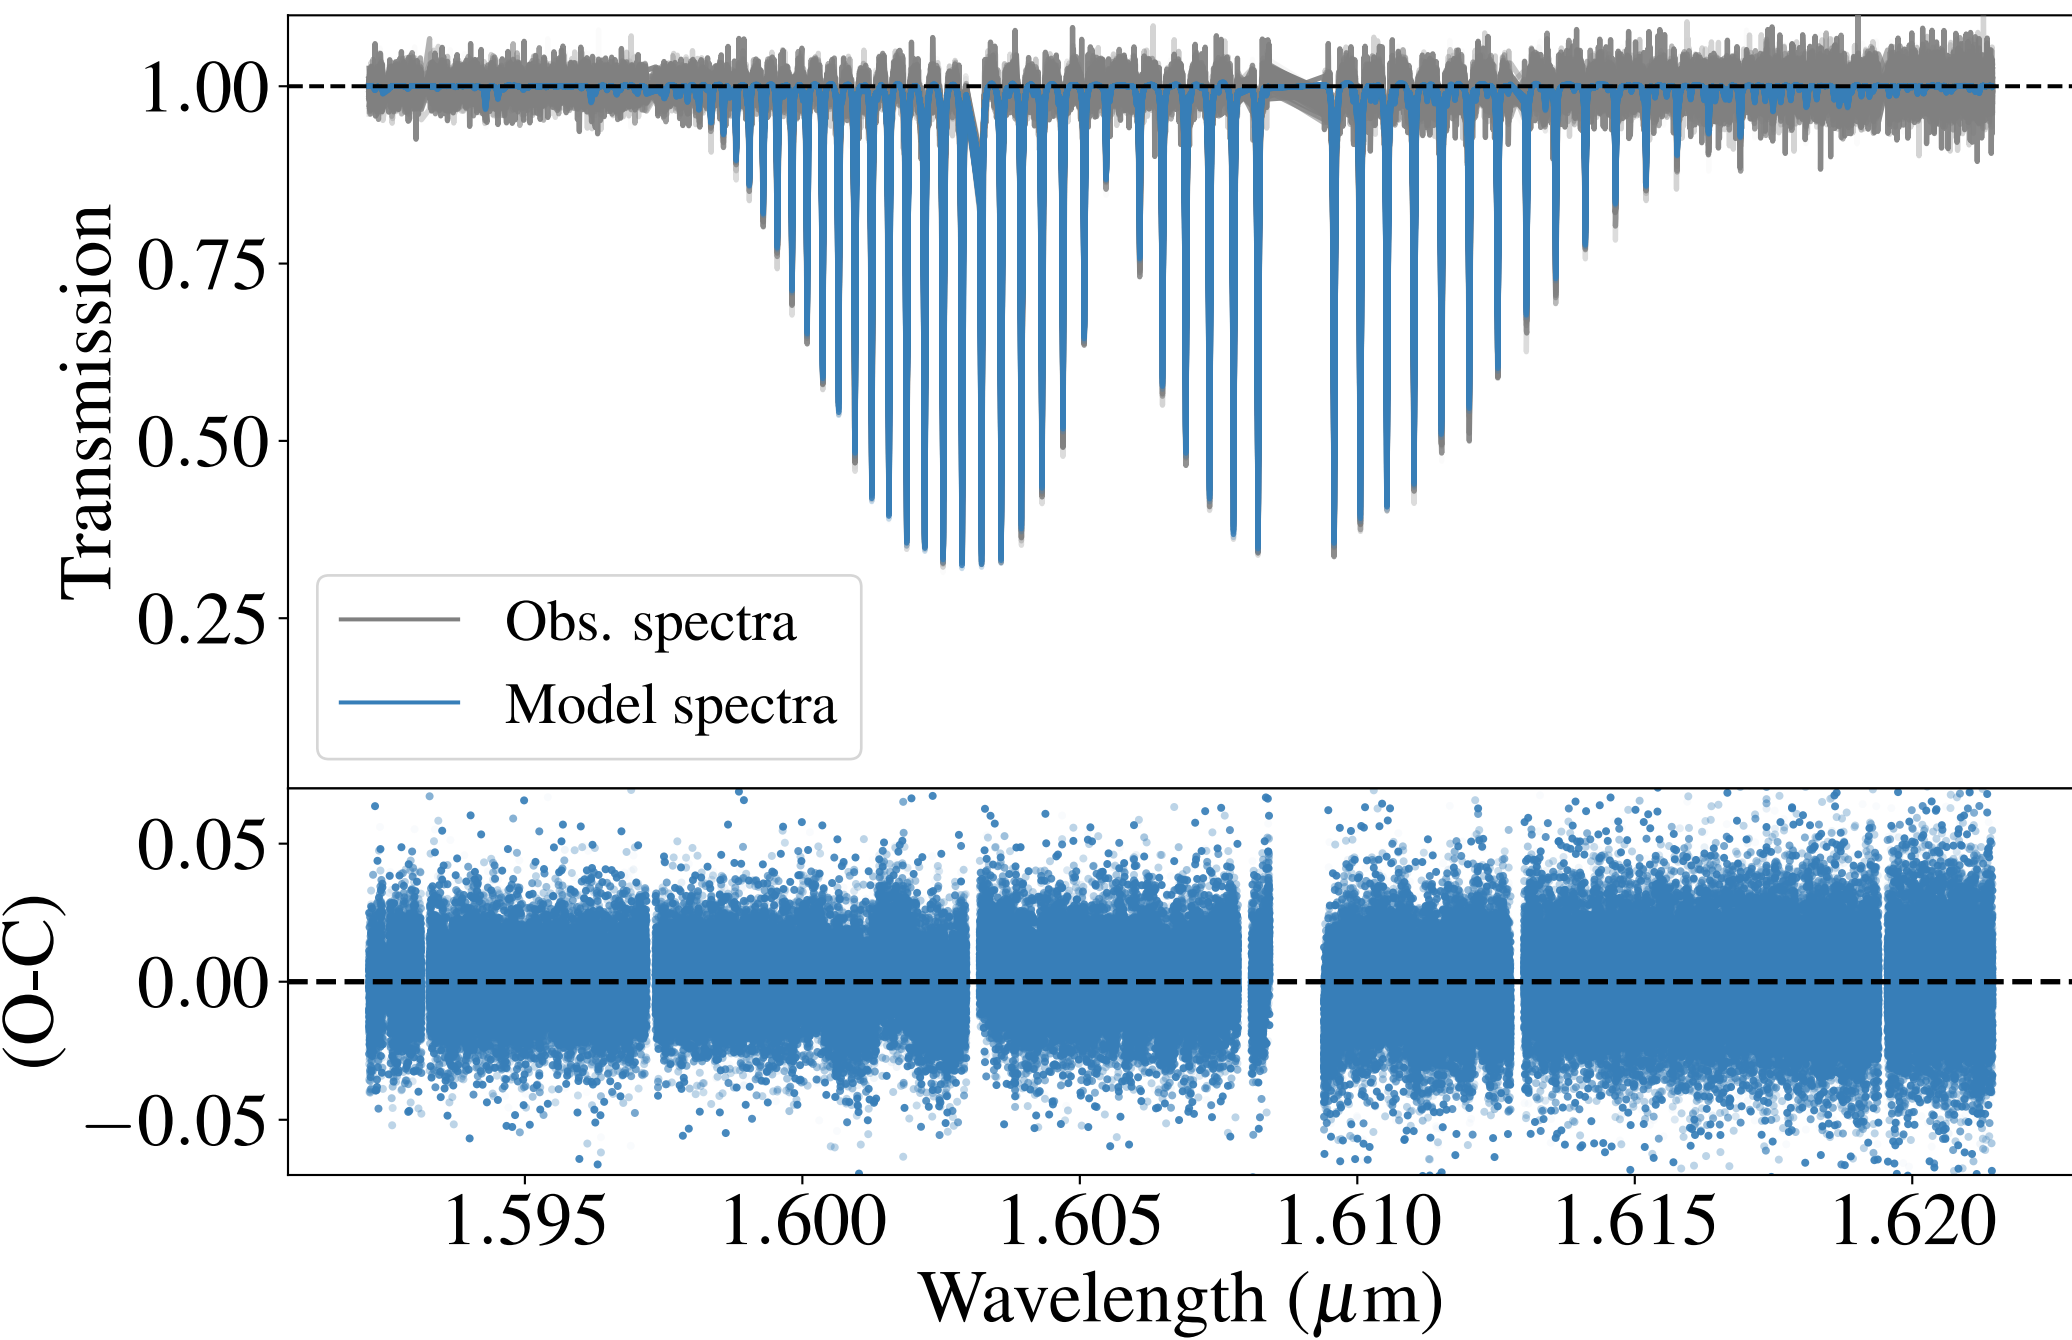

Supplement: Supplementary file 4 [file egusphere-2024-2433-supplement.zip]

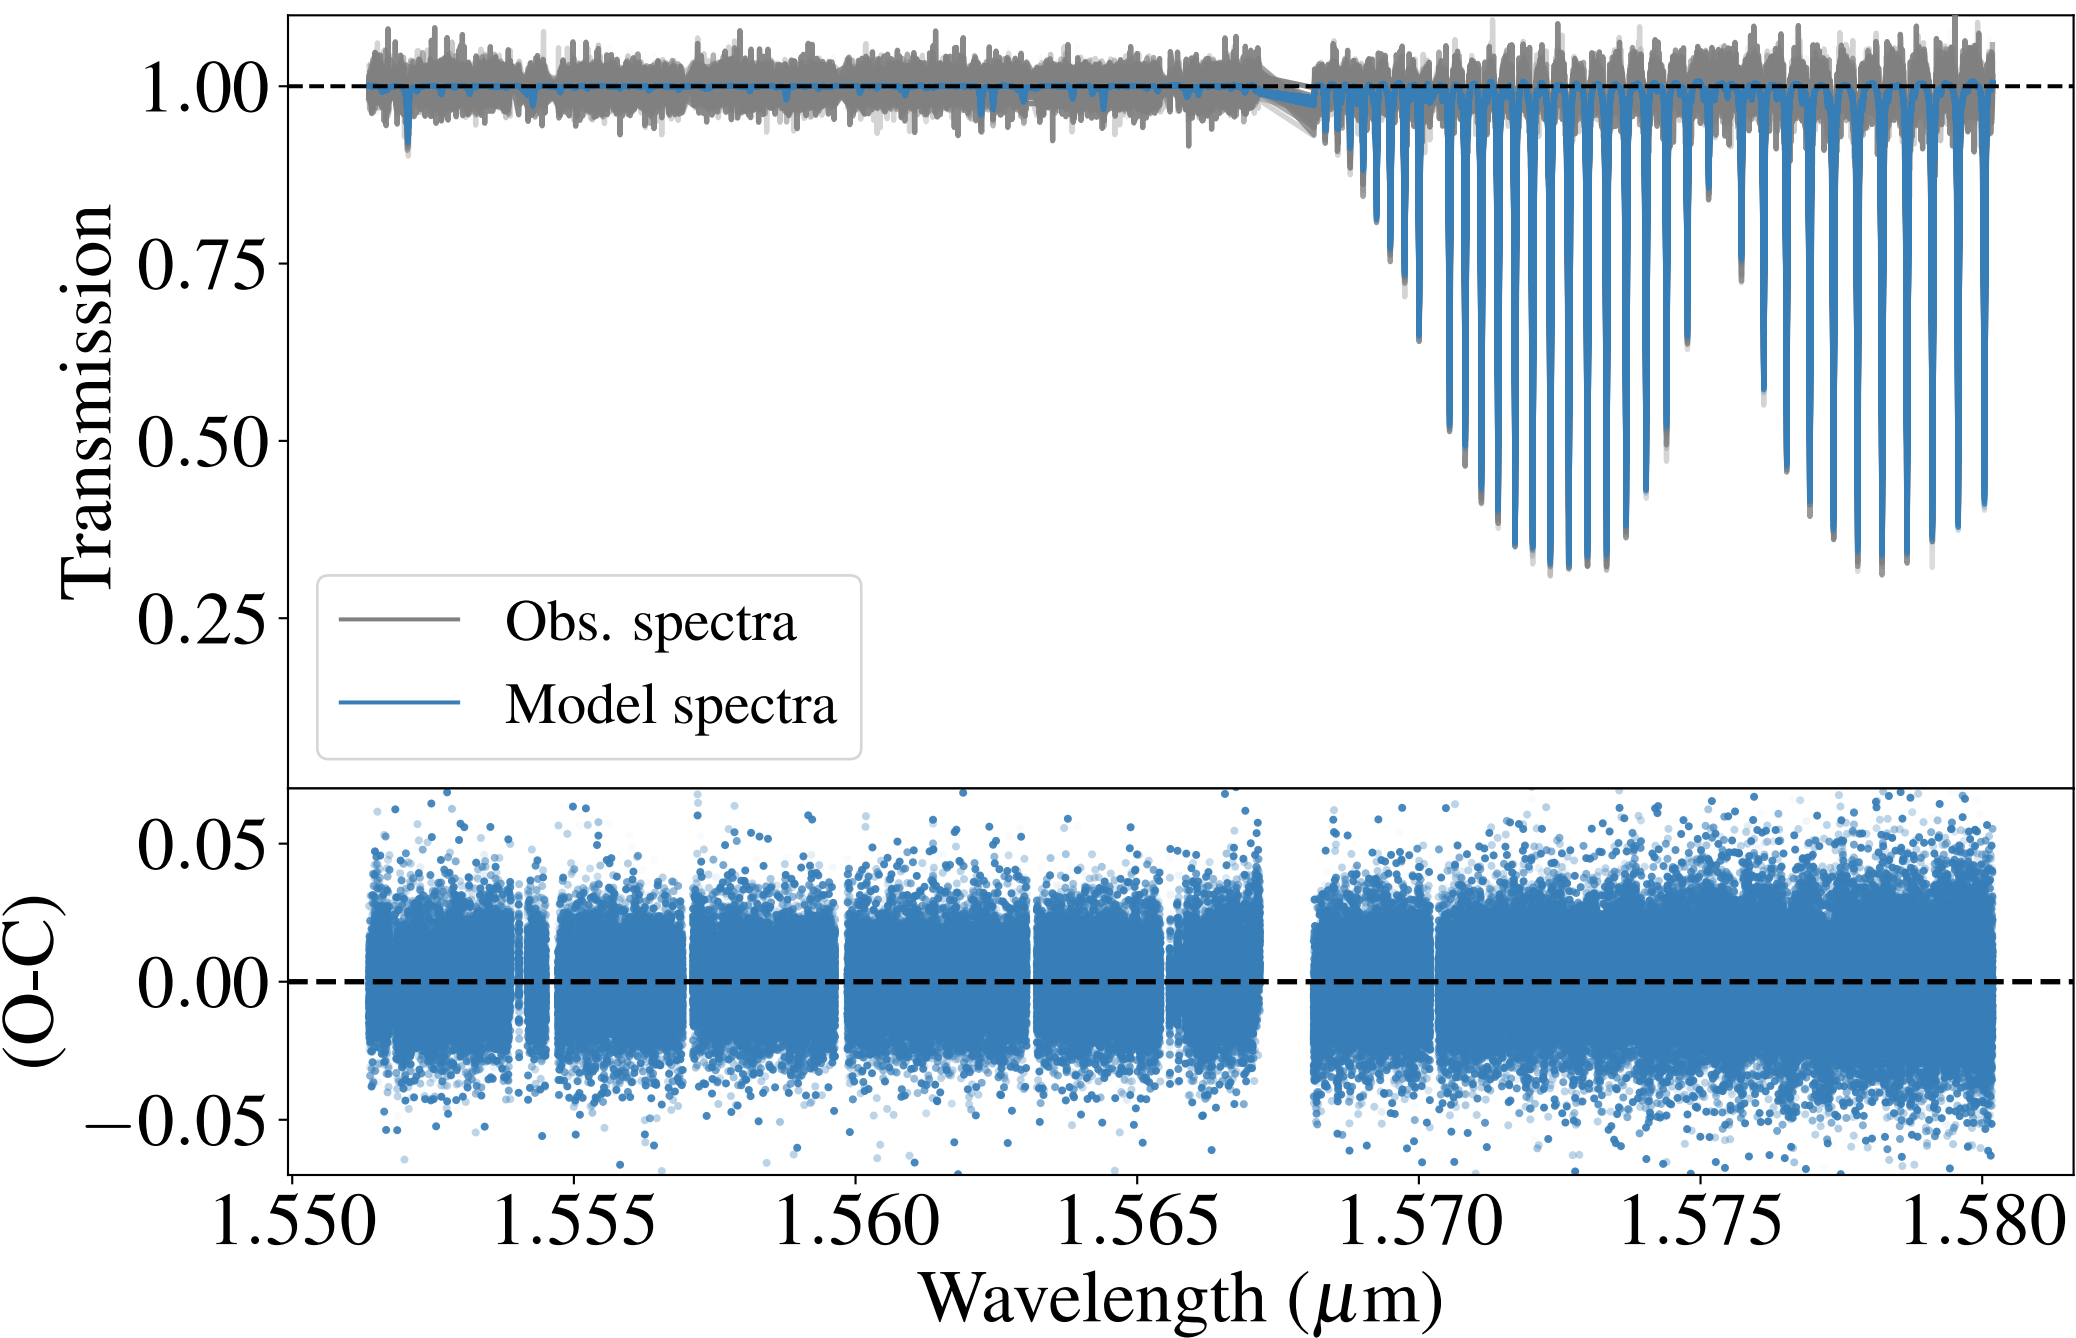

Supplement: Supplementary file 5 [file egusphere-2024-2433-supplement.zip]

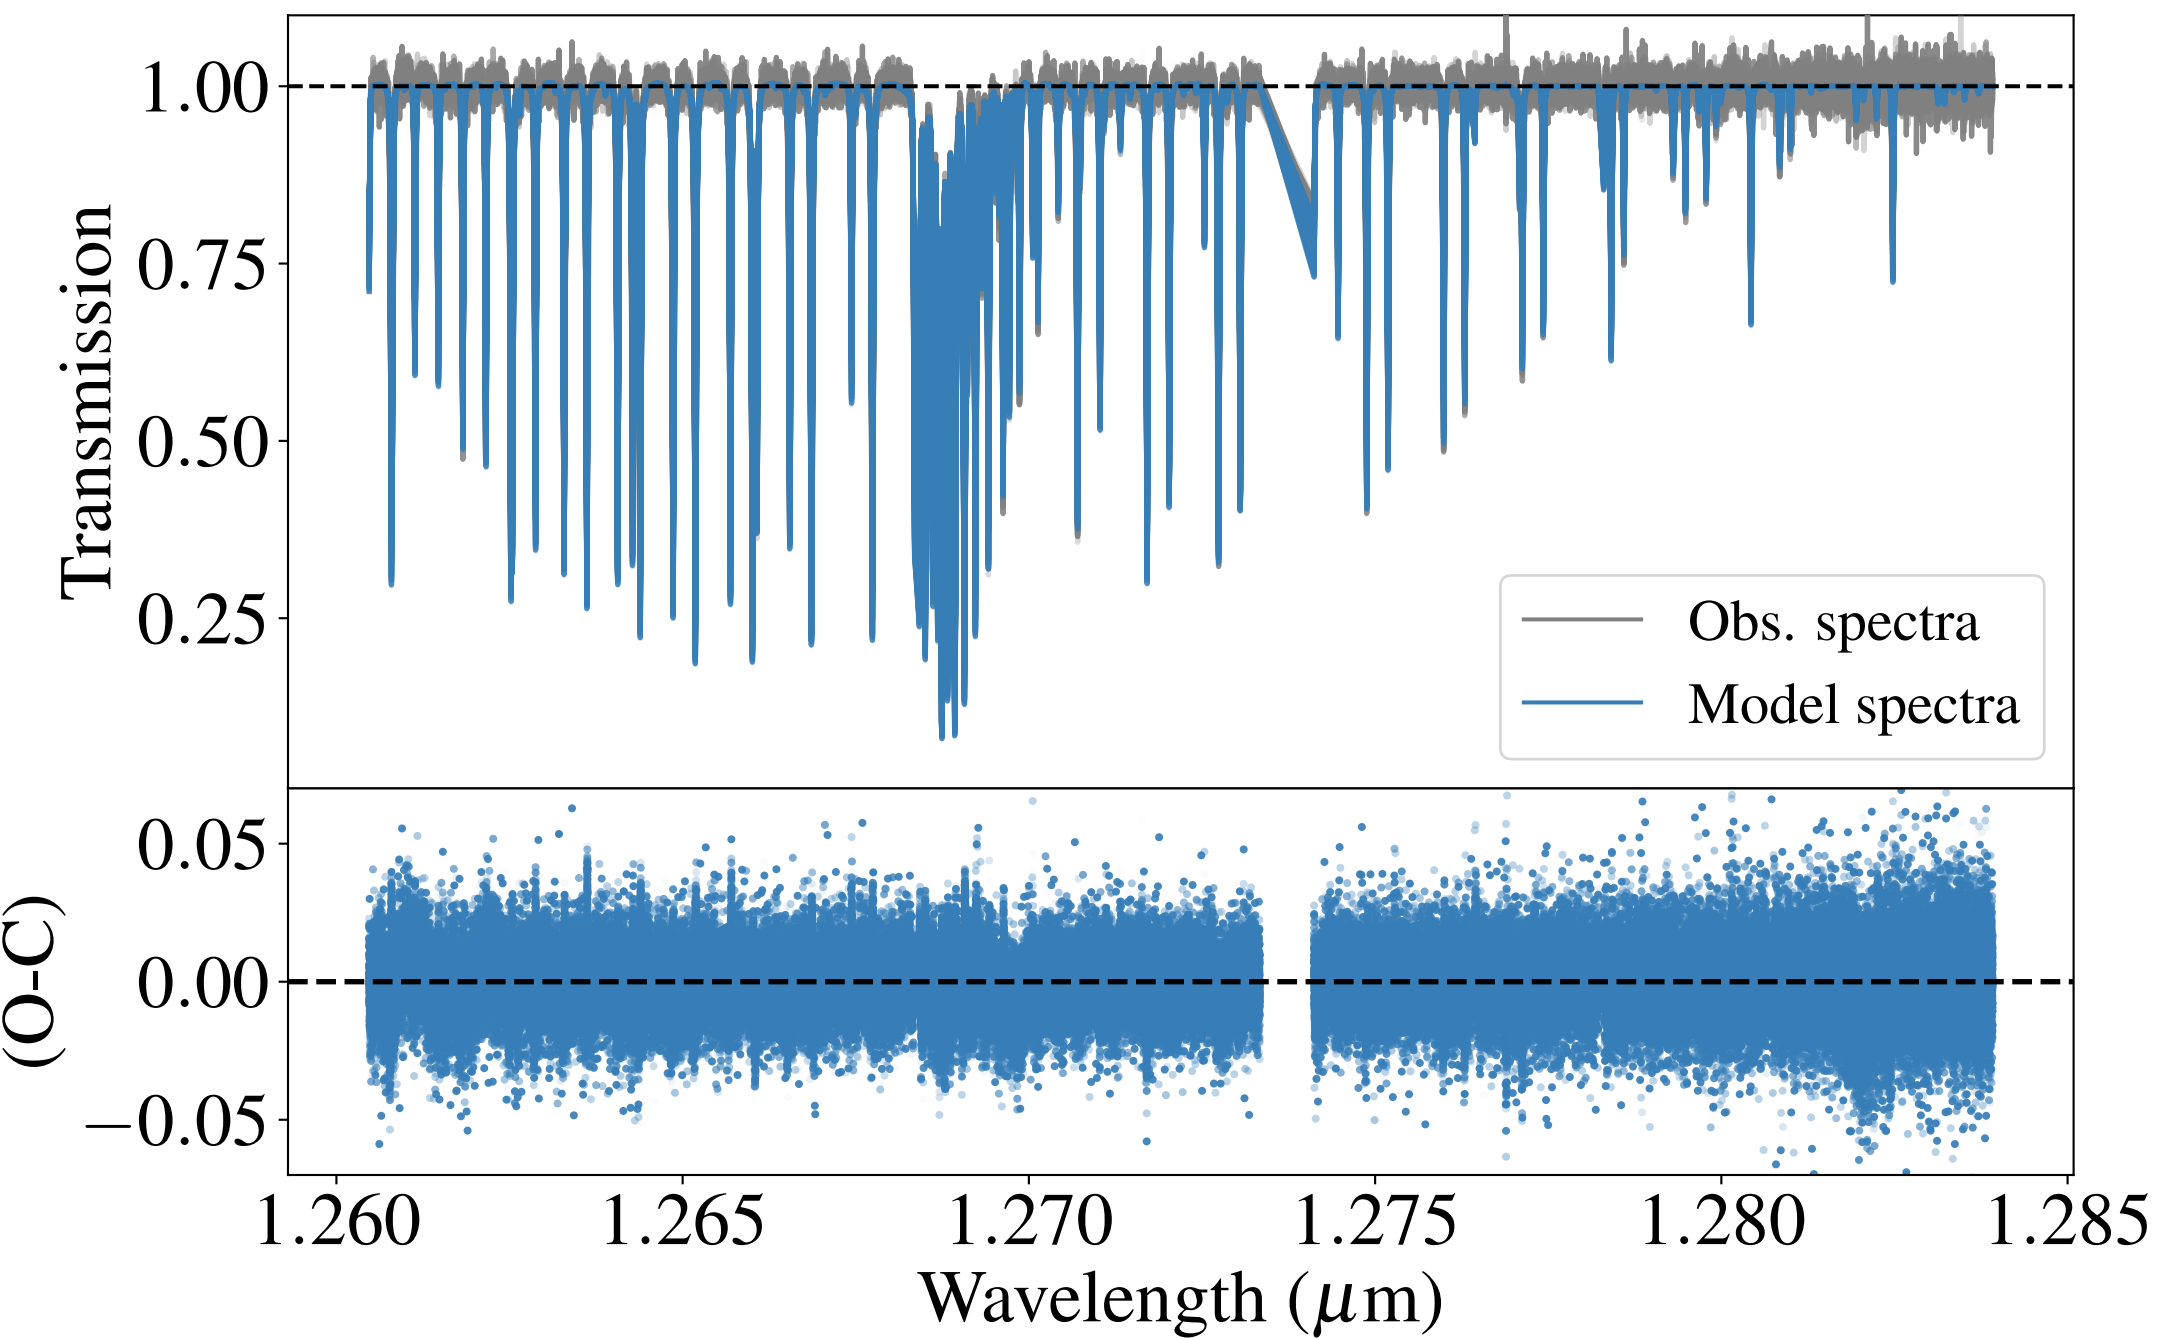

Supplement: Supplementary file 6 [file egusphere-2024-2433-supplement.zip]
